# Supplementary material
Source: PubMed Central journal article supplement (PMC299905)
Supplement: pnas_100_25_15059__6.pdf [file pnas_100_25_15059__6.pdf]

| bmDC     |     |     |      | RAW 264  |         |
|----------|-----|-----|------|----------|---------|
| Position | Non | 2 h | 24 h | Position | RAW 264 |
| -3       | 7   | 12  | 14   | -3       | 1       |
| -2       | 7   | 1   |      | -2       | 5       |
| +1       | 28  | 27  | 20   | -1       | 2       |
| +2       | 1   | 1   |      | +1       | 15      |
| +3       | 1   |     |      | +2       | 4       |
| +28      | 1   |     |      | +3       | 1       |
| +31      | 1   | 1   |      | +5       | 1       |
| +36      |     | 8   |      | +28      | 1       |
| +37      | 1   |     |      | +29      | 1       |
| +38      |     | 1   |      | +40      | 2       |
| +39      | 6   | 4   | 4    | +65      | 1       |
| +61      | 2   |     |      | +68      | 1       |
| +68      | 1   |     |      | +69      | 1       |
| +69      | 1   |     |      | +70      | 1       |
| +73      | 1   |     |      | +85      | 2       |
| +80      | 3   |     |      | +86      | 1       |
| +81      | 1   | 1   |      | +107     | 1       |
| +86      | 2   |     |      | +112     | 1       |
| +93      |     | 1   |      | Total    | 42      |
| +94      |     | 1   |      |          |         |
| +101     | 1   |     |      |          |         |
| +108     | 2   |     |      |          |         |
| +117     |     | 1   |      |          |         |
| +118     |     | 7   |      |          |         |
| +119     |     | 1   |      |          |         |
| +120     |     | 1   |      |          |         |
| Total    | 67  | 68  | 38   |          |         |

**72%**  
**-3 to +3**  
 -10 TTCATCC**ATC** **ACT**TGTGGGT ATCTGCTTTC CCCAGTTCTC ATTCC**CATCAG** AGAACGAGTT  
 51 CTAGCCT**CAT** **GG**AGGAAATG CCTTTGAGAG AGTCAAGTCC TCAAAGGGCA GAGAGGTGCA  
**TM**  
 101 AGAAGT**CATG** GCTCTTGTGC ATAGTGGCTC TGTTACT**GAT** **GCT**GCTCTGT TCTTTGGGTA

**15% (+117 to +120)**  
 in 2 h LPS stimulated bmDC
