# Supplementary material
Source: PubMed Central journal article supplement (PMC299905)
Supplement: pnas_100_25_15059__8.pdf [file pnas_100_25_15059__8.pdf]

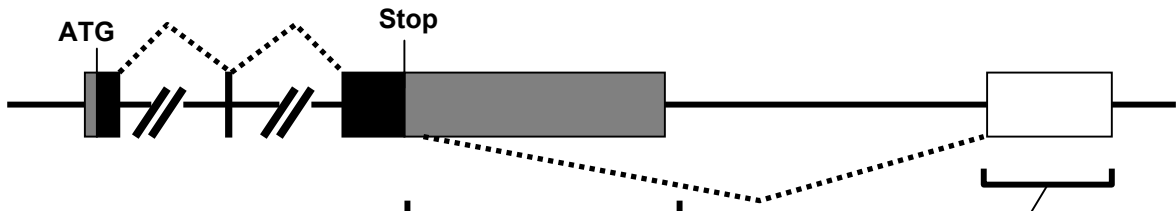

551 TTAATGCCTG ATCTACCATT CATCTCTTAG **AGATTGGGTT** **TGGTCTCCTC**  
 601 **ATCTTCTTCT** **TTGTATCCCA** CCTCTCTGT GTATGTGTTA TGTTGTTTGT  
 651 ATGTATTGCA TGCAATTAT TAGGTGTGCA CATGTATGTG TTGTGCGAGA  
 701 GCCTGTGCAA GTGTGTATGT GCTTGTGGGT GTGGCACTGA GTGTCTTCTC  
 751 TAGTTCCTCT ACCCCTTAAT CTTTGAGACG TGGTGATCTC TCCCTGAACC  
 801 CAGAGTTCAT CTATTTGGCT TGGCCTGCC ACCATTTGGC TCTAAGGATC  
 851 TAGCTATTGC TGCTCACCAG CCACAGTCT CAGATTACAG GTGTGTGCCG  
 901 CTATGCCTGG ATATCACATG GATTTTGAG ATCTAAACTT AGGTCCTTAT  
 951 ACTTACATAG CAGGCATGCT ATCCACAGAG TATTTTCTGG AACTTAATGA  
 1001 TGTCATTCTG TCCCTGTCTT ATTCTTAGGA CAATCAAGGC AGATAGAAAA  
 1051 CGAAAAAAT GATATTGCCA CATACCAGC AAAGGCCCAA CAGAATTGTG  
 1101 ATTTTTTTTT AAGTACCAGT GGGATTGAGA CAGAGGGATA GCTAGCAACA  
 1151 TATAGCATCT GAATTTCTTC CAATGTTATC ATTTACAGTT TTGCGTTCAA  
 1201 TGTATACTCA ACTCTTTTTC TCT**ATTTTAA** AACTACAATA AAATATGTAT  
 1251 TTATAATTGT A

**Stop**

551 TTAATGCCTG ATCTACCATT CATCTCT**TAG** AGATTGGGTT TGGTCTCCTC  
 601 ATCTTCTTCT TTGTATCCCG AGATGCTGGT GGGTGGGTTG GAGGGGGATG  
 651 ATGTATTGCA ATGCACACAG TTTGTGAGGG CTTACAAATT GACACAATCA  
 701 GAGCCTCTTG GCATATAAAA TTTTAGCCCT CATATCTGTC TGAAGAGGAC  
 751 TCAGCAAATG GGCCAATCCC TAATGTTGGG TCTGCAAATG GACTTGTACA  
 801 ATCCATGATA AAAAGGAGTA TGGGCCACAG AAGACAGAAA CTCTTCCAAA  
 851 GAATGTCTTT CTAACCTTGA TCCCTGGGTA GAATGAGATC CTGTTTCCAT  
 901 GGGAGTCTTA CTTGGCTTGC AAAAAAGGGT GTAGGGCAGT AGCTTGGCCT  
 951 TTTTCCATC ATAATTTCTT TGAGCTGTTT TACCTTAATC CCTCCAAACT  
 1001 CTCACCTTCT GAGAGCCTCC TAATGAAACA TTGTTAGACT GGTGGGGTGG  
 1051 CCAAGACATG CCAACAACAC CCTTCTTTAG AGGTGGTGT TTTAGAGGAC  
 1101 AGAGAACATT ATGAAGCCTA GAGCAGCAGA GGTCAAGATG CCACGAAATG  
 1151 GAATGATCT GGAATTTTT TTTTTTTTTC ATTCTCAGGA TGCAGTTTCA  
 1201 TTCTGAACTT TCCCTTAGGC CTTTATTGCT TTTGTGTGTA TGTGTGCATA  
 1251 AATTCTGCAA ATAGAAAAAT GAGAGTTTGC ACCAGTACTC ACTAGATTTA  
 1301 ACACCAGAAA GTGGTACTTT TCTGGCTGTA TTATGCCATG ATAGCACATT  
 1351 TTCTGTTGGT GTTCCCTAAC TGACAAGTAT AACAGTTTTT CTAACCACA  
 1401 CAACAATGCT ATGATGTTAA TGGGGTAGAT ATTTTTGGA AAAAAATTGCA  
 1451 CAGTGAGAAC ATGGGTAGAT GAACCCTAAG ACTCTTACCT CAATTCAGAA  
 1501 CTCGCAAGGA GTTAAGTGAG TGGGGTCTTC ATTAGACCAT TCACATGGTC  
 1551 TCTGCTTGA AACTGGCGTT GCTACTGTCT CATTATACAT CACTAAAAATG  
 1601 GAATTAATC AACTTTGAAA TGGATGCATC GACTTTACCC CAAGGTGTCC  
 1651 AGAATGAAGC TACAAGACTT TTACCAGCAG TCATTTTCTT TTTGCCCTGGA  
 1701 GCAAGAAGAT CCAGGATACT GTTGAAGAG TTCATCTCAC TCAACCATGC  
 1751 TGACTTTCCA AAGTAATAAT GAACATTTGT GTTCAAATTT TGGATTCTGT  
 1801 **TAAATTTAGC** CAGCTTGTGA GTTCTGTGCG AAAAGT**ATTT** **TAAACCAATT**  
 1851 TACACT**ATTT** **ATGGGTATTT** GTGAAAAGCT ATATAGTGAT **ATTTTATATA**  
 1901 **TAACTAATTT** **AAAAATTTT** **TATTTTATGT** AACAAAAATA CTATAGGCTA  
 1951 AGCTATTTCT TCT**ATTTTT** **TTATGAATAC** TTGCTGAATT GCCATAGGGC  
 2001 ACAAAGACTC TTCTGTTTGC ATATCTTCTC AGGAA**ATTA** AATGTATCA  
 2051 CATGTATTTA TAAGAA
