# Supplementary material
Source: PubMed Central journal article supplement (PMC299905)

# Mouse Chromosome 1

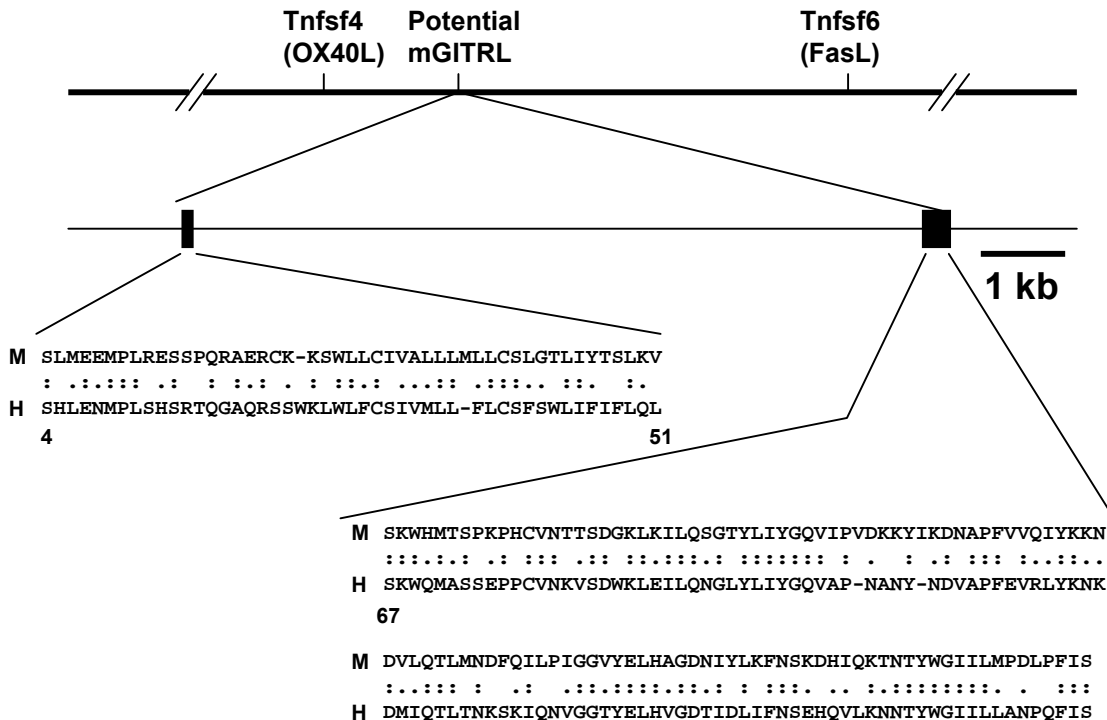

Supplement: pnas_100_25_15059__2.pdf [file pnas_100_25_15059__2.pdf]

**A**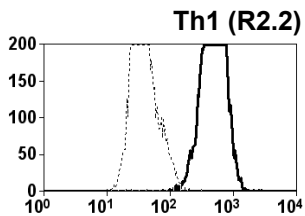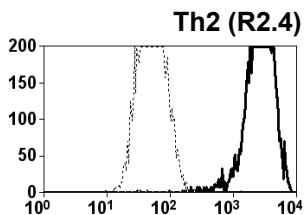

mGITR

**B**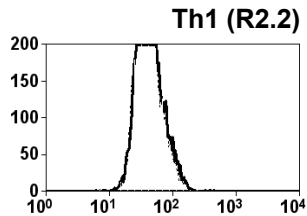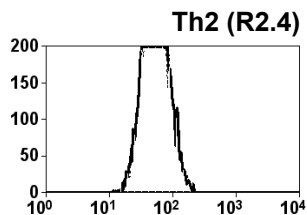

mGITRL

Supplement: pnas_100_25_15059__4.pdf [file pnas_100_25_15059__4.pdf]
